# Supplementary material for: Gene expression during Drosophila melanogaster egg development before and after reproductive diapause
Source: PubMed Central journal article supplement (PMC2700134; doi:10.1186/1471-2164-10-242), 2009-05-24

(0,1,3,3,2) n=1091

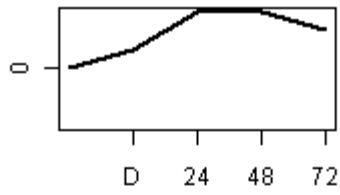

(0,4,5,8,4) n=45

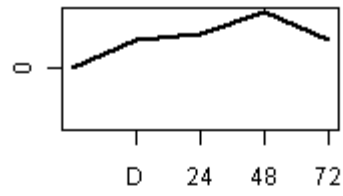

(0,4,6,5,6) n=25

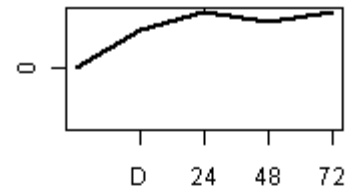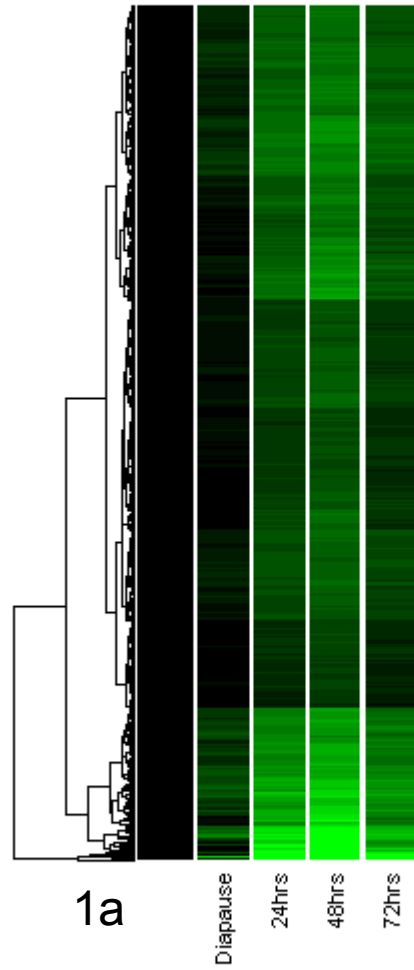

1a

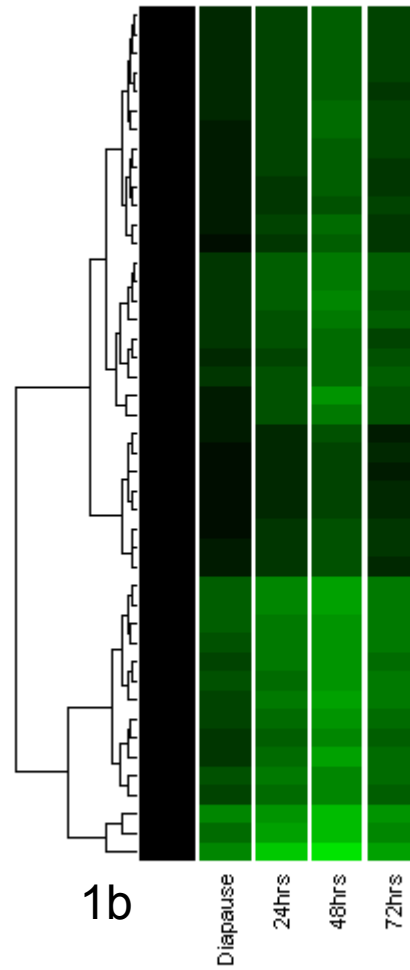

1b

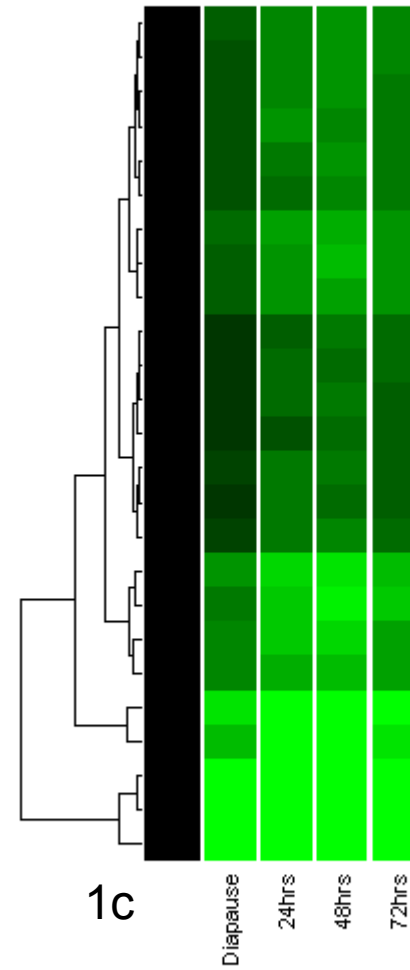

1c

Color Key

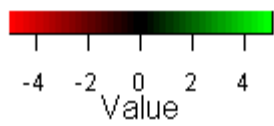

Color Key

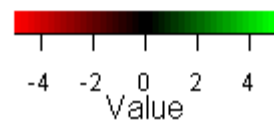

Color Key

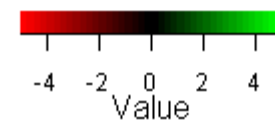

(0,-2,0,0,-1) n=64

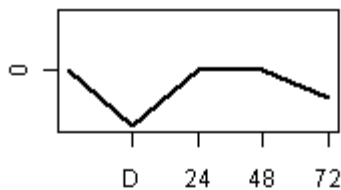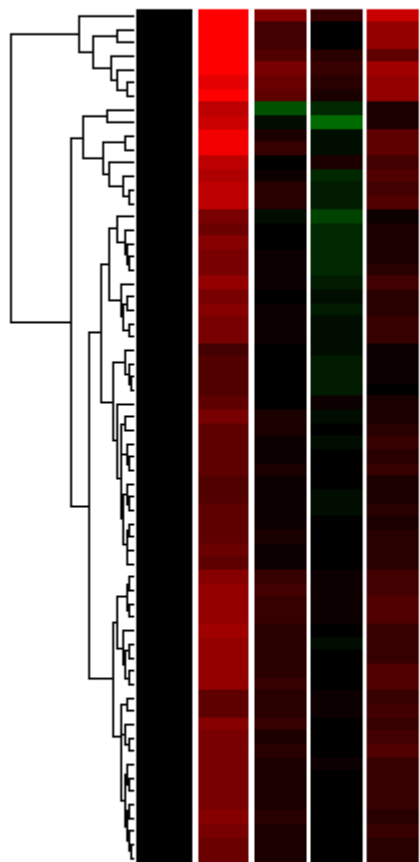

2a

Diapause  
24hrs  
48hrs  
72hrs

Color Key

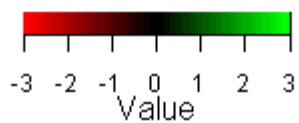

(0,-2,2,2,1) n=270

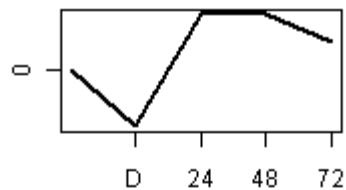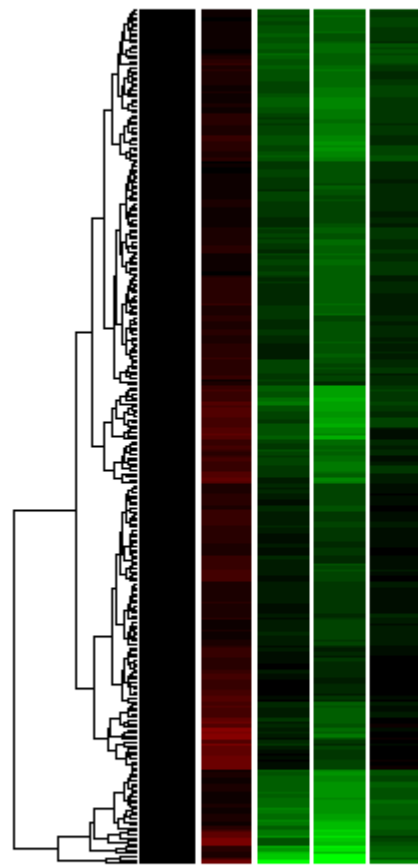

2b

Diapause  
24hrs  
48hrs  
72hrs

Color Key

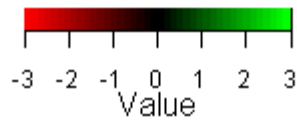

(0,-1,0,0,0) n=21

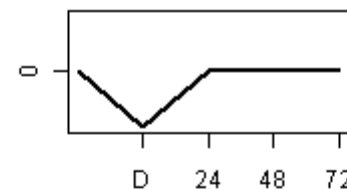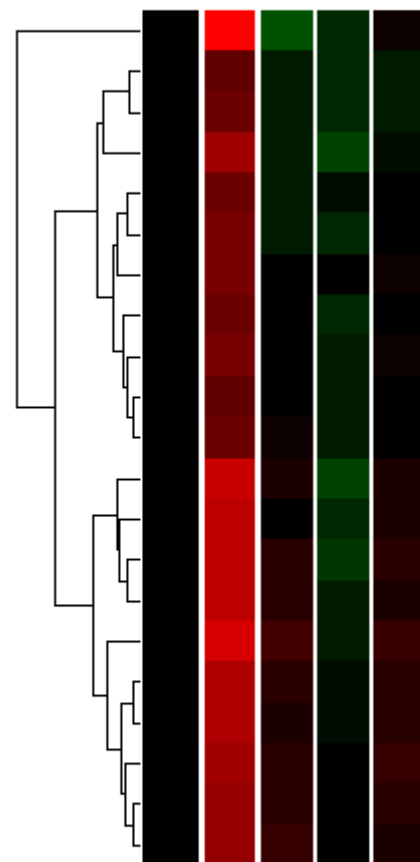

2c

Diapause  
24hrs  
48hrs  
72hrs

Color Key

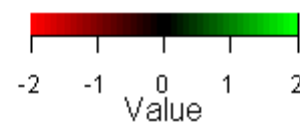

(0,0,1,4,1) n=80

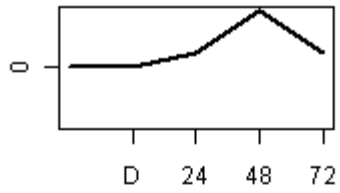

(0,0,1,4,3) n=116

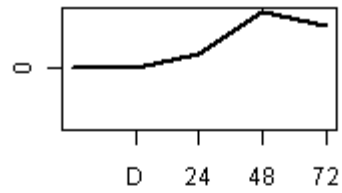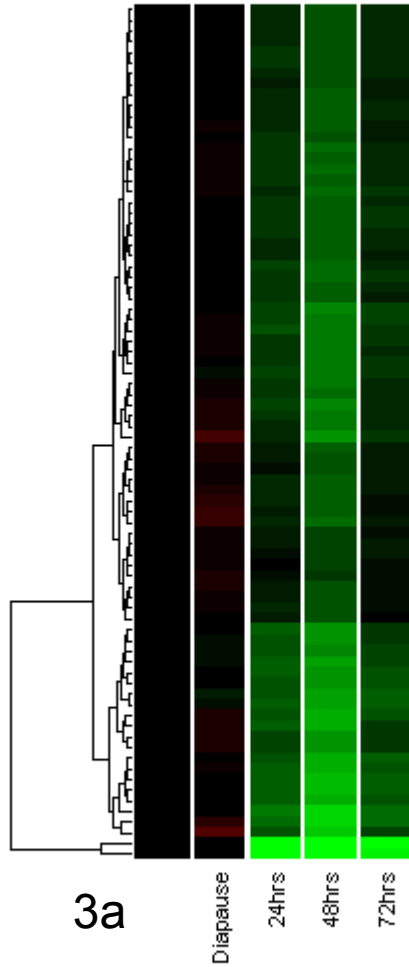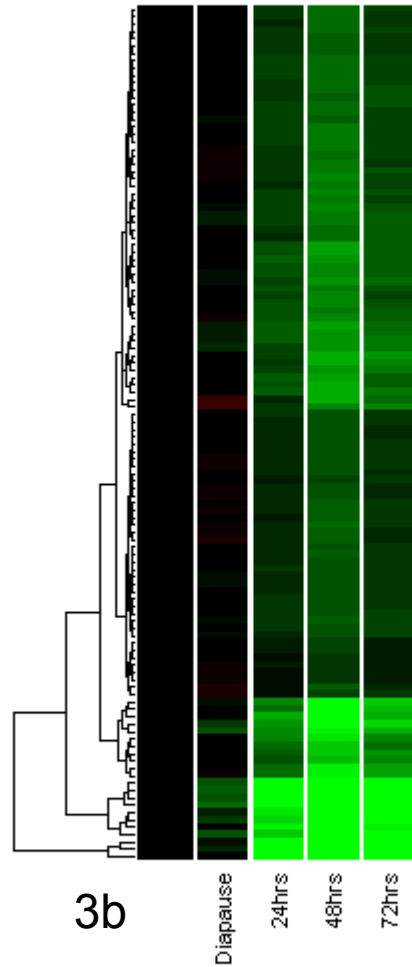

Color Key

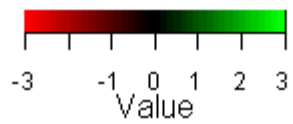

Color Key

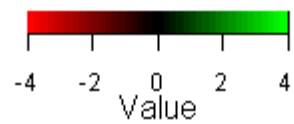

(0,-4,-3,-3,-3) n=48

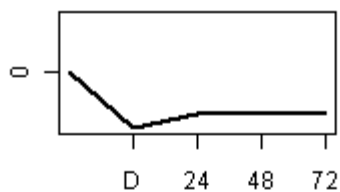

(0,-3,-2,-1,-1) n=41

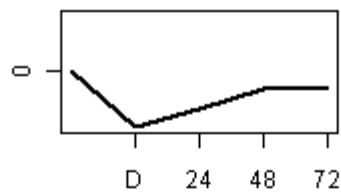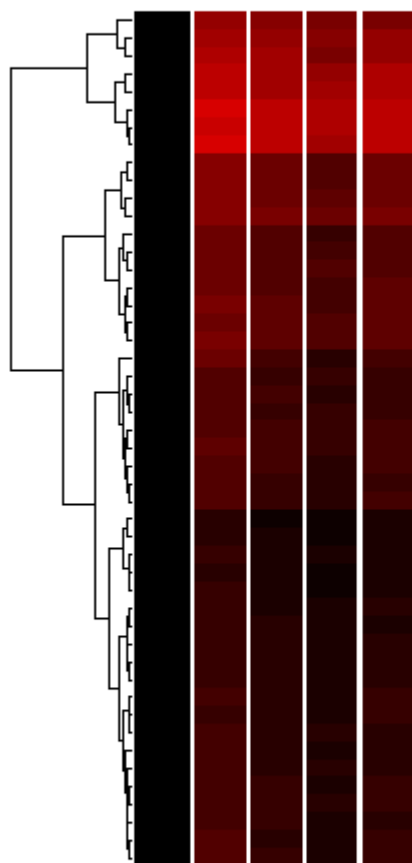

4a

Diapause  
24hrs  
48hrs  
72hrs

Color Key

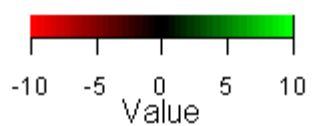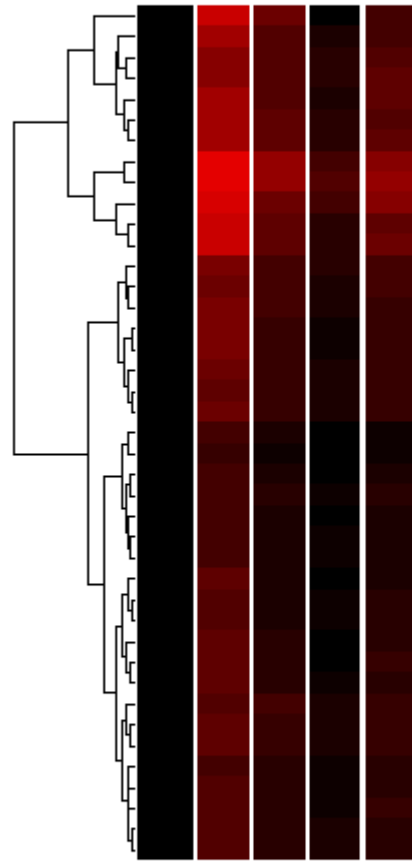

4b

Diapause  
24hrs  
48hrs  
72hrs

Color Key

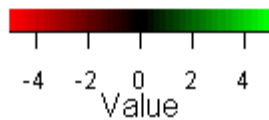

(0,-3,-1,2,2) n=39

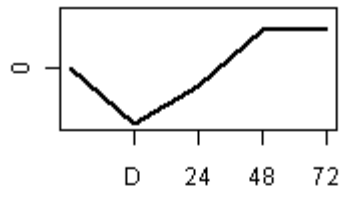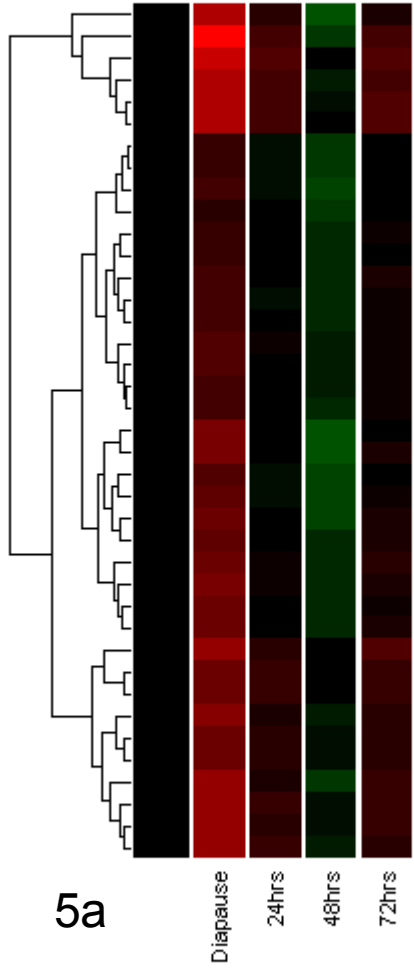

5a

Color Key

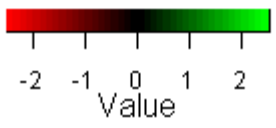

Supplement: 1471-2164-10-242-S23.pdf [file 1471-2164-10-242-S23.pdf]
